# Supplementary material for: S9.6 Antibody–Enzyme Conjugates for the Detection of DNA–RNA Hybrids
Source: PubMed Central journal article supplement — Bioconjug Chem. 2023 Apr 17;34(5):834–44. doi: 10.1021/acs.bioconjchem.2c00609 (PMC10197132; doi:10.1021/acs.bioconjchem.2c00609), 2023-04-17
Supplement: bc2c00609_si_001.pdf [file bc2c00609_si_001.pdf]

## **Supporting Information**

### **S9.6 Antibody-Enzyme Conjugates for Detection of DNA-RNA Hybrids**

Elena Wei<sup>†</sup>, Charles Bou-Nader<sup>‡</sup>, Megan L. Perry<sup>†</sup>, Rasem Fattah<sup>†</sup>, Jinwei Zhang<sup>‡</sup>, Stephen H. Leppla<sup>†</sup>, Ankur Bothra<sup>†\*</sup>

<sup>†</sup>Laboratory of Parasitic Diseases, National Institute of Allergy and Infectious Diseases, Bethesda MD 20892, United States

<sup>‡</sup>Laboratory of Molecular Biology, National Institute of Diabetes and Digestive and Kidney Diseases, Bethesda, MD 20892, United States

\*Corresponding author: 33 North Drive, Bethesda, MD 20892, United States; Phone: (240) 669-5433; Email: [ankur.bothra@nih.gov](mailto:ankur.bothra@nih.gov)

**Supporting Figure:**

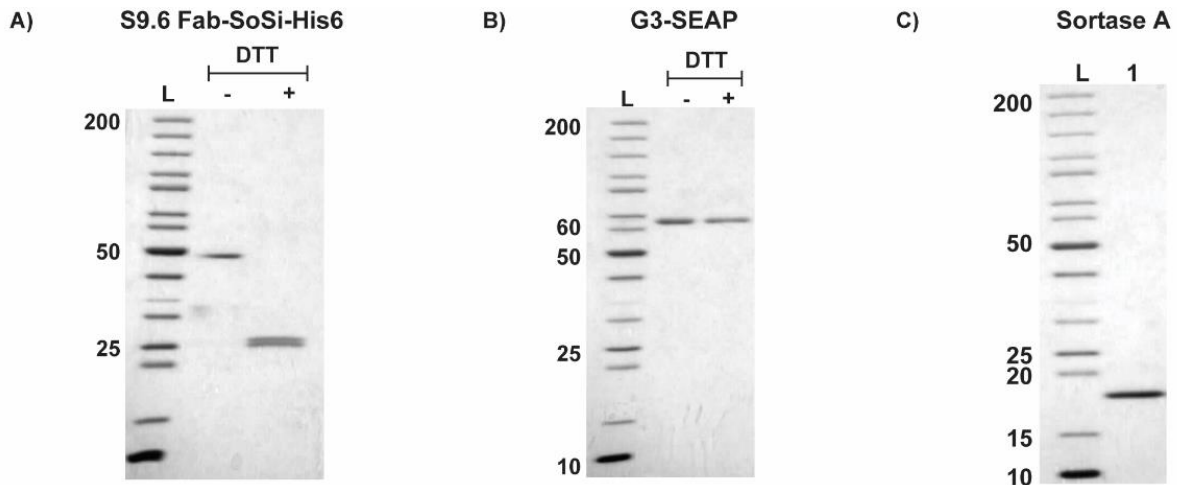

**S1:** (A) Coomassie-stained polyacrylamide gels with a reference ladder [lane L]; (A) disulfide linked S9.6-Fab [49 kDa, lane DTT(-)] and a mixture of the reduced light and heavy chains (24 kDa and 25 kDa, respectively) [lane DTT(+)]; (B) purified G3-SEAP (54 kDa monomer). The G3-SEAP dimer is not disulfide linked. (C) Purified SrtA (lane 1).

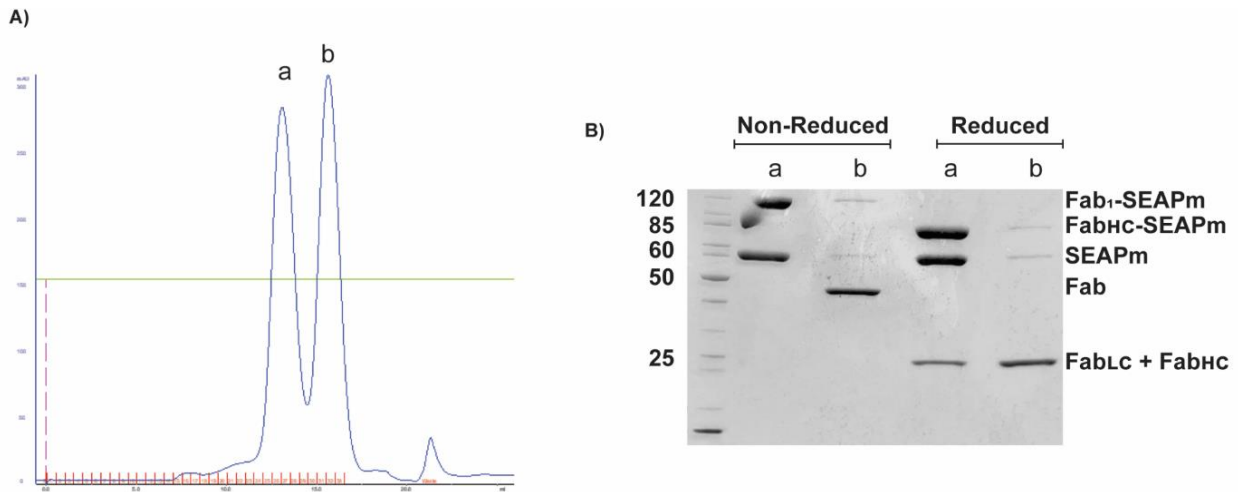

**S2:** (A) Elution profile of proteins from fraction ii of Fig. 2A purified through size-exclusion Superdex-200 column. The two peaks marked as “a” and “b” were collected. (B) Peak “a” has Fab<sub>L</sub>-SEAP<sub>m</sub> (114 kDa) and possibly some free SEAP<sub>d</sub> (seen as denatured SEAP<sub>m</sub> at 54 kDa in non-reduced lane). The reduced lane confirms site specific conjugation of SEAP to Fab<sub>Hc</sub> (seen as Fab<sub>Hc</sub>-SEAP<sub>m</sub> at 84 kDa). Peak “b” non-reduced and reduced lanes show the presence of disulfide linked S9.6 Fab (seen as Fab<sub>Lc</sub> + Fab<sub>Hc</sub> at 25 kDa).

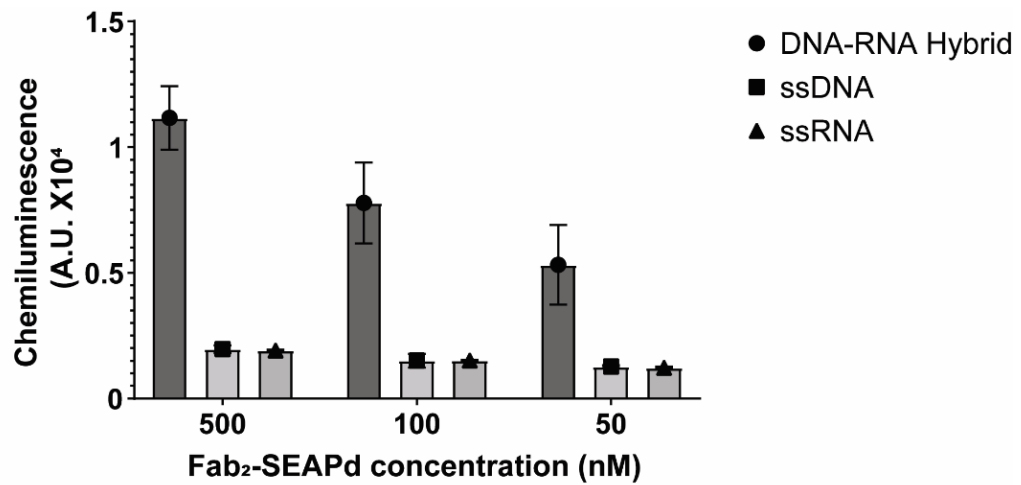

**S3:** Specific binding of 10 pmole of DNA-RNA hybrid, ssDNA and ssRNA with 500, 100 or 50 pmole S9.6 Fab<sub>2</sub>-SEAPd. in 100  $\mu$ L of reaction measured in chemiluminescent units (A.U.)

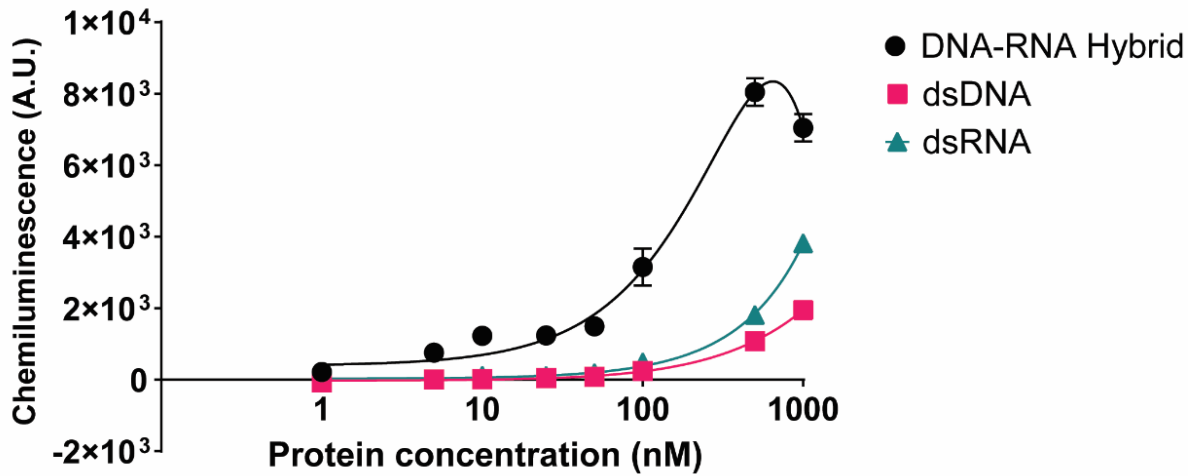

**S4: The HC-S ELISA using S9.6 Fab<sub>2</sub>-SEAPd genetic fusion protein:** Specific binding and identification of DNA-RNA hybrid with S9.6 Fab-SEAP genetic fusion protein is quantified by chemiluminescence (A.U.). Note: the S9.6 Fab-SEAP genetic fusion protein could non-specifically detect the dsDNA and dsRNA after a high concentration of 1  $\mu$ M.

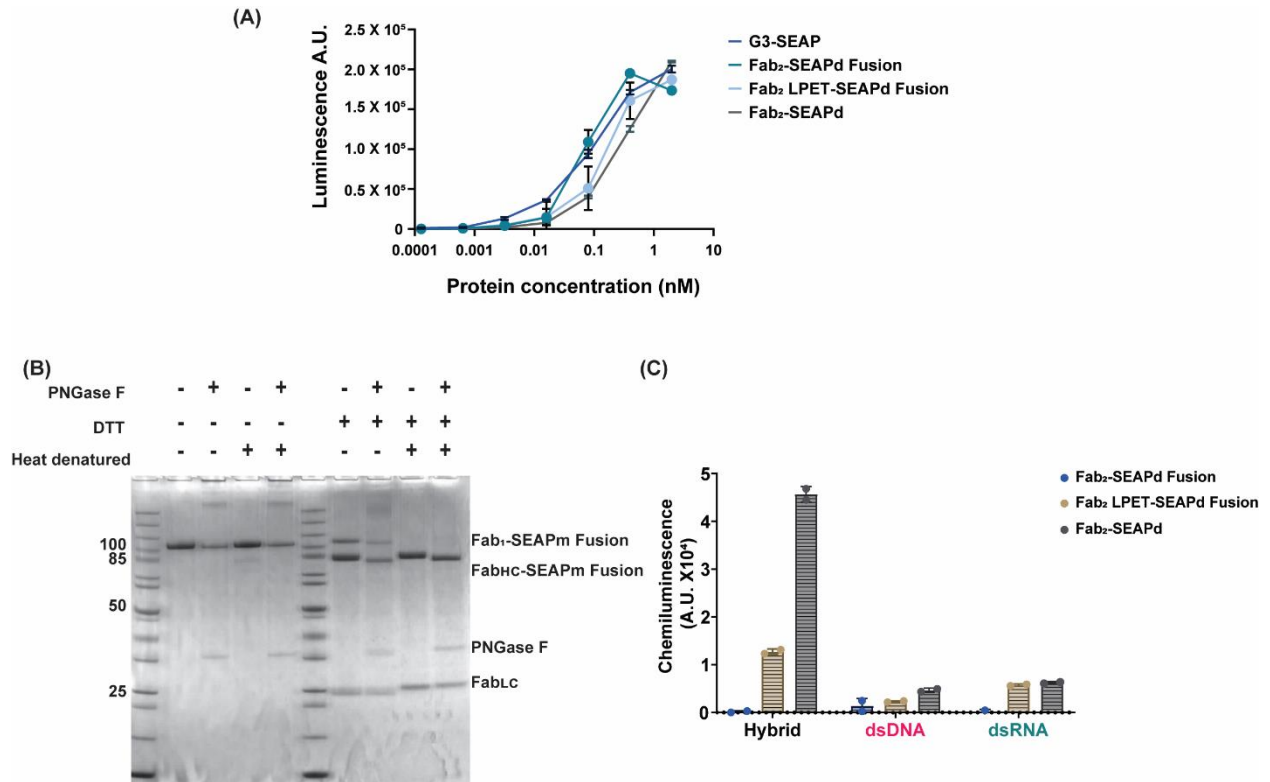

**S5: Investigation of difference in activity between sortase A conjugated and genetic fusion protein of S9.6 Fab-SEAP.** (A) SEAP enzyme catalytic activity in G3-SEAP and variants of Fab<sub>2</sub>-SEAPd proteins. The activity was measured in chemiluminescence units (A.U.) using mentioned concentrations of individual proteins. (B) Mass shift observed in deglycosylated S9.6 Fab<sub>2</sub>-SEAPd genetic fusion protein. The mass shift was only observed in the HC-SEAP fusion polypeptide. Samples with DTT but without PNGase F or heat show incomplete reduction. (C) Experiment done as in Fig. 5C but with deglycosylated S9.6 Fab-LPET-SEAP genetic fusion and Fab<sub>2</sub>-SEAPd proteins.

**Supporting File 1:**

>G3-SEAP [With mouse N-terminal IgG signal sequence, bold and underlined]

**MGWSCILFLVATATGVHS**GGGIIPVEEENPDFWNREAAEALGAAKKLQPAQTAAKNLIIFLGD  
GMGVSTVTAARILKGQKKDKLGPEIPLAMDRFPYVALSKTYNVDKHVPDSGATATAYL CGVKG  
NFQTIGLSAAARFNQCNTTRGNEVISVMNRAKKAGKSVGVTTRVQHASPAGTYAHTVNRNW  
YSDADVPASARQEGCQDIATQLISNMDIDVILGGGRKYMFRMGTPDPEYPDDYSQGGTRLDGKN  
LVQEWLAKRQGARYVWNRTELMQASLDPSVTHLMGLFEPGDMKYEIHRDSTLDPSLMEMTEA  
ALRLLSRNPRGFVVEGGRIDHGHESRAYRALTETIMFDDAIERAGQLTSEEDTSLVTADHSH  
VFSFGGYPLRGSSIFGLAPGKARDRKAYTVLLYGNGPGYVLKDGARPDVTESESGSPEYRQQA  
VPLDEETHAGEDVAVFARGPQAHLVHGVQEQTFAHVMAFAACLEPYTACDLAPPAGTTDAAH  
PG\*

>G3-SEAP [secreted G3-SEAP with N-terminal GGG, red]

GGGIIPVEEENPDFWNREAAEALGAAKKLQPAQTAAKNLIIFLGDGMGVSTVTAARILKGQKKD  
KLGPEIPLAMDRFPYVALSKTYNVDKHVPDSGATATAYL CGVKGNFQTIGLSAAARFNQCNTTR  
GNEVISVMNRAKKAGKSVGVTTRVQHASPAGTYAHTVNRNWYSDADVPASARQEGCQDIA  
TQLISNMDIDVILGGGRKYMFRMGTPDPEYPDDYSQGGTRLDGKNLVQEWLAKRQGARYVWN  
RTELMQASLDPSVTHLMGLFEPGDMKYEIHRDSTLDPSLMEMTEAALRLLSRNPRGFVVEGG  
RIDHGHESRAYRALTETIMFDDAIERAGQLTSEEDTSLVTADHSHVFSFGGYPLRGSSIFGLAP  
GKARDRKAYTVLLYGNGPGYVLKDGARPDVTESESGSPEYRQQA VPLDEETHAGEDVAVFAR  
GPQAHLVHGVQEQTFAHVMAFAACLEPYTACDLAPPAGTTDAAH PG\*

## Supporting File 2:

### (A) Intact mass analysis of S9.6-Fab SoSi-His6:

Non-reduced S9.6-Fab SoSi-6His

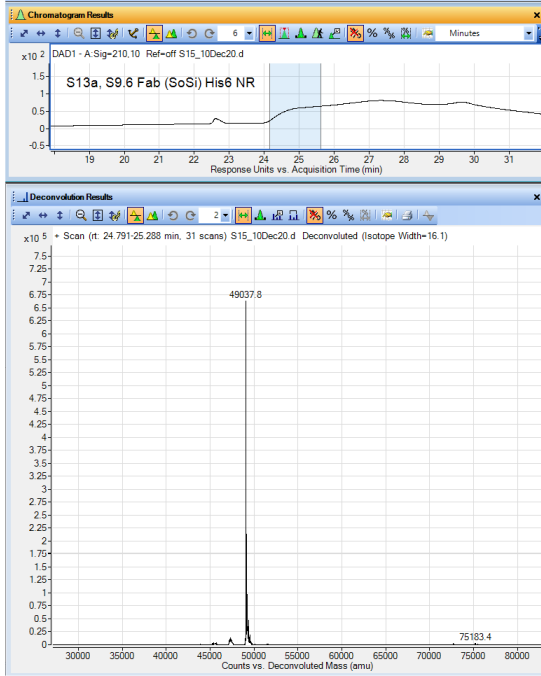

Reduced S9.6-Fab SoSi-His6

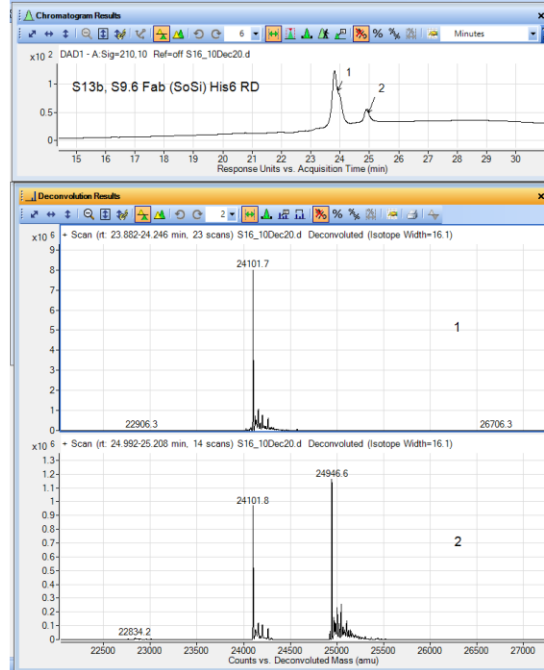

| Protein                                                           | Calculated Mass | Observed Mass | $\Delta$ Mass | Possible modification |
|-------------------------------------------------------------------|-----------------|---------------|---------------|-----------------------|
| S9.6 Fab (SoSi) His6 Non-reduced<br>Peak at 24.79 min – 25.28 min | 49046.7         | 49037.8       | -8.9          | None                  |
| S9.6 Fab (SoSi) His6 reduced<br>Peak 1 at 23-24 min               | 24100.8         | 24101.7       | 0.91          | None                  |
| S9.6 Fab (SoSi) His6 reduced<br>Peak 2 at 25 min                  | 24100.8         | 24101.8       | 1.01          | None                  |

**(B) Intact mass analysis of GGG-SEAP (G3-SEAP):**

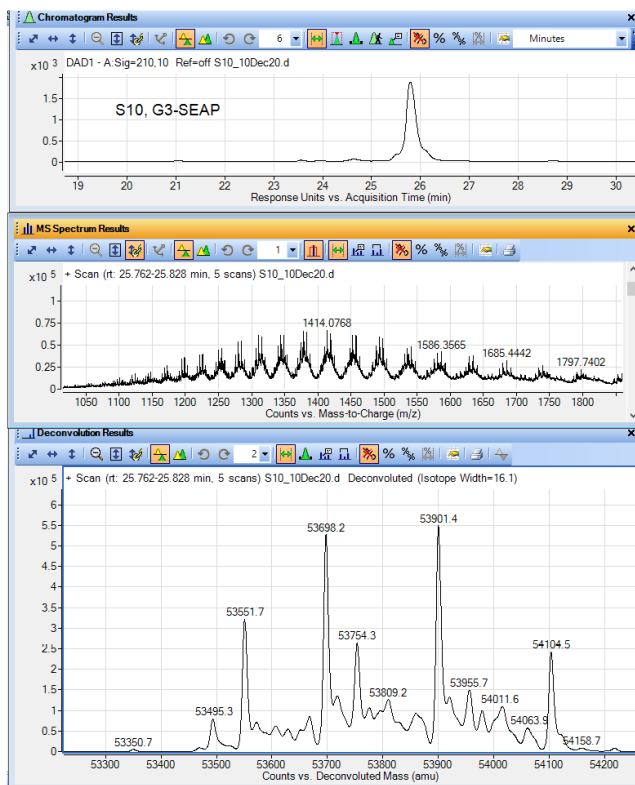

| Polypeptide | Calculated Mass | Observed Mass | $\Delta$ Mass | Possible modification  |
|-------------|-----------------|---------------|---------------|------------------------|
| GGG-SEAP    | 53349.93        | 53350.7       | 0.77          | Non-glycosylated       |
|             | 53349.93        | 53495.3       | 145.37        | Minor component        |
|             | 53349.93        | 53551.7       | 201.77        | Minor component        |
|             | 53349.93        | 53698         | 348.07        | Possible glycosylation |
|             | 53349.93        | 53754         | 404.07        | Minor component        |
|             | 53349.93        | 53901         | 551.07        | Possible glycosylation |
|             | 53349.93        | 54104         | 754.07        | Minor component        |

**(C) Intact mass analysis of S9.6-Fab-SEAP fusion:**

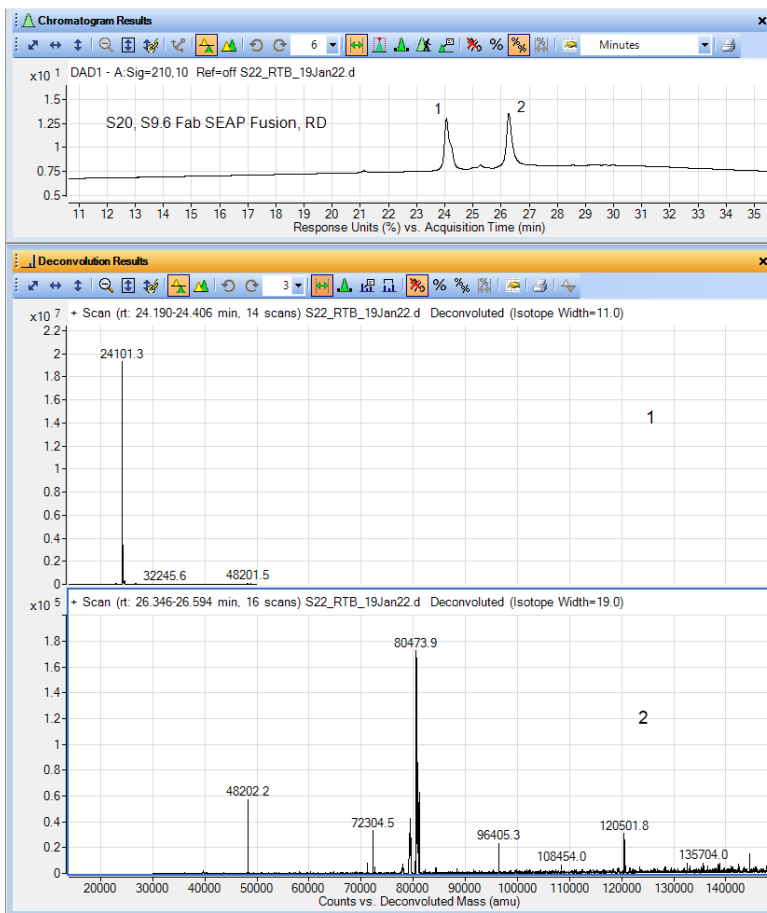

| Polypeptide | Calculated Mass | Observed Mass | $\Delta$ Mass | Possible modification |
|-------------|-----------------|---------------|---------------|-----------------------|
| HC          | 24881.91        | 24882.20      | 0.29          | None                  |
| LC          | 24100.79        | 24101.30      | 0.51          | None                  |
| HC-GGG-SEAP | 77723.38        | 80475.20      | 2751.82       | Glycosylation         |
